# Supplementary material
Source: PubMed Central journal article supplement (PMC3115733)
Supplement: NIHMS283990-supplement-supplemental_material1.pdf [file NIHMS283990-supplement-supplemental_material1.pdf]

## Supplementary Material

### aMD input and output parameters

The aMD module in NAMD uses the following parameters:

|                   |                                                              |
|-------------------|--------------------------------------------------------------|
| <i>aMD</i>        | turn on/off aMD, default off.                                |
| <i>aMDE</i>       | the acceleration threshold energy $E$                        |
| <i>aMDalpha</i>   | the acceleration factor $\alpha$ , must be a positive number |
| <i>aMDdihe</i>    | turn on/off the aMDd mode, default on.                       |
| <i>aMDskip</i>    | skip the first aMDskip steps, default 0.                     |
| <i>aMDOutFreq</i> | aMD output frequency, default 1.                             |

When *aMD* is turned on, an aMD output line is added to the log file, which contains the the boost potential ( $dV$ ) at the current timestep and the average boost potential ( $dVAVG$ ) since the last aMD output. By default, the aMDd mode is used and the boost is applied to the dihedral potential. When the parameter *aMDdihe* is turned off, aMD is switched to the aMDT mode and the boost is applied to the total potential.

### Benchmark simulation protocols

Benchmark simulations were performed on the protein RmlC (pdb code 1nxm), a 388-residue enzyme from the bacterium *Streptococcus suis*. The simulation system, containing 60,298 atoms in total, include 6168 protein atoms, 18038 TIP3P water molecules, and 16 Na<sup>+</sup> ions. All the benchmark simulations were performed on the supercomputer Ranger at Texas Advanced Computing Center. Each node on Ranger consists of four quad-core AMD opteron processors. All nodes are interconnected using InfiniBand. The benchmark simulations were performed using 2, 4, 5, 6 and 8 nodes, respectively. Each simulation was repeated three times, and benchmark data provided in the log files were averaged to give the benchmark performance (ns/day). All the simulations were performed under NVT conditions using a 2-fs timestep, and a 1-1-2 multiple-time-stepping algorithm.

The cutoff for short-range non-bonded interactions was 12 Å, with a switching distance of 10 Å. Long-range electrostatic forces were calculated using the Particle Mesh Ewald (PME) method (31) with a grid density of at least  $1/\text{Å}^3$ . The temperature was maintained at 300 K for all simulations using Langevin dynamics.

### Metadynamics simulation protocols

A 100-ns metadynamics simulation was performed for the gas-phase alanine dipeptide using the collective variable module in NAMD (14). The same conditions in gas-phase cMD and aMD simulations were used here. A bin width of  $5^\circ$  and a Gaussian biasing potential of width  $10^\circ$  and height 0.1 kcal/mol were chosen, resulting a free energy map with a resolution of  $5^\circ$ . For comparison with the rest of the simulations, we converted the resolution of the free energy map to  $15^\circ$  by combining data from nine neighboring bins:

$$\Delta G_{i,j}^\dagger = -k_B T \ln \left[ \sum_{3i-2, 3j-2}^{3i, 3j} \exp(-\beta \Delta G_{m,n}) / 9 \right]$$

where  $\Delta G_{m,n}$  is the free energy value at  $(\Phi_m, \Psi_n)$  in the original map, and  $\Delta G_{i,j}^\dagger$  is the free energy value at  $(\Phi_i, \Psi_j)$  in the new map.

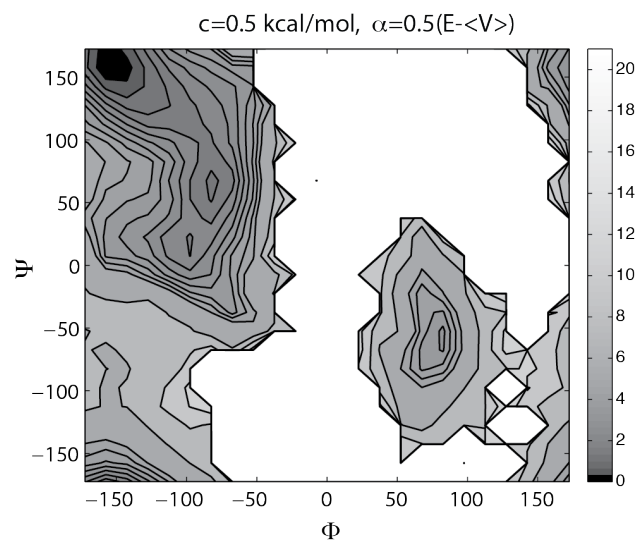

Figure S1: Replica simulation of the gas-phase alanine dipeptide aMD simulation with  $c=0.5 \text{ kcal/mol}$  and  $\alpha=0.5(E - \langle V \rangle)$  (see Fig 4).

## Sample aMD configuration file

```
structure      wtdia.psf
coordinates    wtdia.pdb

set temperature      300
set outputname      sample-aMD
set inputname       mineq-wtdia-01

bincoordinates      $inputname.coor
binvelocities       $inputname.vel
extendedSystem      $inputname.xsc
firsttimestep       0

paraTypeCharmm      on
parameters          par_all127_prot_lipid.prm

wrapWater           on
wrapAll             on

exclude             scaled1-4
1-4scaling          1.0
cutoff              12.
switching           on
switchdist          10.
pairlistdist        13.5
```

|                    |                      |
|--------------------|----------------------|
| timestep           | 2.0                  |
| rigidBonds         | all                  |
| nonbondedFreq      | 1                    |
| fullElectFrequency | 2                    |
| stepspercycle      | 10                   |
| PME                | yes                  |
| PMEGridSizeX       | 30                   |
| PMEGridSizeY       | 30                   |
| PMEGridSizeZ       | 30                   |
| langevin           | on                   |
| langevinDamping    | 1.0                  |
| langevinTemp       | \$temperature        |
| langevinHydrogen   | off                  |
| outputName         | \$outputname         |
| restartname        | \$outputname.restart |
| dcdfile            | \$outputname.dcd     |
| xstFile            | \$outputname.xst     |
| restartfreq        | 500                  |
| dcdfreq            | 50                   |
| xstFreq            | 50                   |
| outputEnergies     | 50                   |
| outputPressure     | 50                   |

# AMD Settings

aMD on  
aMDdihe on  
aMDE 14.  
aMDalpha 5.5  
aMDOutFreq 50

run 50000000
